# Supplementary material for: A Simple Proteomics-Based Approach to Identification of Immunodominant Antigens from a Complex Pathogen: Application to the CD4 T Cell Response against Human Herpesvirus 6B
Source: PubMed Central journal article supplement (PMC4658110; doi:10.1371/journal.pone.0142871), 2015-11-23

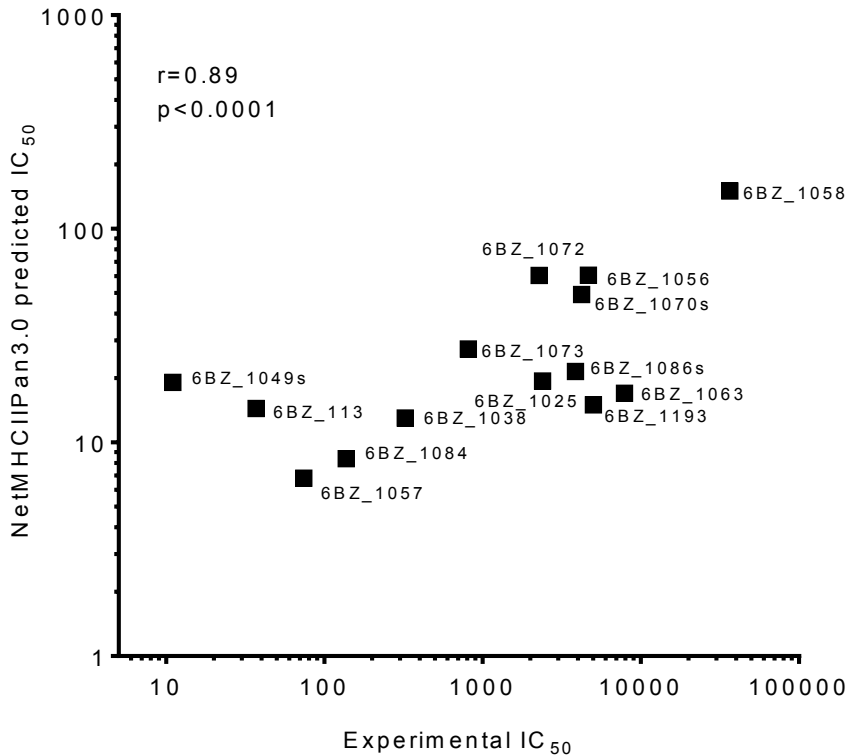

Supplement: pone.0142871.s002.pdf [file pone.0142871.s002.pdf]
