# Supplementary material for: A Simple Proteomics-Based Approach to Identification of Immunodominant Antigens from a Complex Pathogen: Application to the CD4 T Cell Response against Human Herpesvirus 6B
Source: PLoS One. 2015 Nov 23;10(11):e0142871. doi: 10.1371/journal.pone.0142871 (PMC4658110; doi:10.1371/journal.pone.0142871)
Supplement: S3 Table — (XLSX) [file pone.0142871.s005.xlsx]

## Sheet: S3 Table
S3 Table: Peptides for which positive IFN-g responses in PBMCs were observed by ELISpot.
Protein	Pool#	Peptide Id	Sequence	IFN-g response1		Number positive2
				Mean	n	ER	DFR2x
U11	4	6BZ_1013	SLMDFASLDGRMPSDLS	20.971	3		2
U11	4	6BZ_1018	IQDILHNQSGTELKLPT	14.751	3	1
U11	4	6BZ_1019	KNENFNAVYSQRVLQTP	22.8043	3	2	2
U11	4	6BZ_1028	PVSSVSLMSGVEPLSSL	10.751	3	1
U11	4	6BZ_1029	GVEPLSSLTSTNLDLRD	17.6377	3	2	1
U11	4	6BZ_1037	DKDGFRKQKKLDLLGSW	30.3043	3	2	1
U11	4	6BZ_1047	LMSGVEPLSSLTSTNLD	19.8053	3	1	1
U11	4	6BZ_1053	DLARLKISQPKSLDAPL	7.52767	3	1
U11	5	6BZ_1056	SINKLVYLGKLFVTLNQ	26.4688	4	4
U11	5	6BZ_106	SHGNYRIGPSGILDFGV	22	3	2	2
U11	5	6BZ_1062	LNQSWSKLEKVAMSQIV	15.4167	3	1	1
U11	5	6BZ_1073	DVDELKTLYNTFILWLM	31.75	3	3	2
U11	5	6BZ_1075	TGTPFVLNNSDVAGSEA	5.389	3	1
U11	5	6BZ_1085	IFAGLNKKYARDVSRGG	28.3333	3	2	2
U11	5	6BZ_1092	ITDVVNGLANLNLRQNK	7.16667	3	1
U11	5	6BZ_1093	FLSNLENLENVDLREHP	4.41667	3	1
U11	7	6BZ_1200	NTFILWLMYHYVLSKRK	78.5583	3	2	1
U11	7	6BZ_1210	LWLMYHYVLSKRKPDYN	15.5417	3	1
U11	7	6BZ_1214	DITKLQNVVNEYLKSKG	6.625	3	1
U11	7	6BZ_1215	VERILEVSDPQNLFKNF	16.9583	3	2	1
U11	7	6BZ_1216	RVNKILAEFTNLISLGE	6.04167	3	1
U14	8	6BZ_020	RDNSYMPLIALSLHENG	5.56933	3	1
U14	8	6BZ_1025	LKETILDLAALISNMNL	32.0833	3	3	3
U14	8	6BZ_1027	TDSDFFNVTPENAFSSI	16.6667	3	2
U14	8	6BZ_1030	IITKFKFSRSRDLLMSV	34.75	3	2	1
U14	8	6BZ_1052	VIRKLNRNEGRTSSRAS	20.375	3		1
U14	8	6BZ_1061	KIPKYSLKEAVDIYSDN	6.33333	3	1
U14	9	6BZ_1081	TEEAMRQLDRALMGLFV	14.4167	3	1
U14	9	6BZ_1090	VEQILIIITKFKFSRSR	8.875	3	1
U14	9	6BZ_1097	LEVEMQSLSAVVYGAVA	21.9167	3	1
U14	9	6BZ_1126	FIKAVRLIQTTVNSFHN	13.25	3	1	1
U14	9	6BZ_1143	IYNDLLFLTSTWNMIYN	4.54167	3	1
U39	11	6BZ_012	QEDALKMLKAIKSLDES	7.06933	3	1
U39	11	6BZ_107s	LFLAVFLMNSVLMIYSD	67.2527	3	3	3
U39	11	6BZ_1251	YPFSYFALTTGEIVEGS	7.65267	3	1
U39	11	6BZ_1268	AIVVVVIIIVVFVRQKH	17.236	3	1
U39	11	6BZ_1269	MSEGFFIIYKTNIETYT	5.15267	3	1
U48	16	6BZ_1016	PNVTFVISPSYVIKGVS	15.9443	3	1
U48	16	6BZ_1021	PMNDILRLSTVPAVKQF	11.2777	3	1
U48	16	6BZ_1034	FTPDFMILYIQNPAGDL	20.1527	3	1	1
U48	16	6BZ_1042	LLLKFNNLGIQTLLRGD	7.65267	3	1
U48	16	6BZ_1051	GIYYIRVVEVRQMQYDN	38.1527	3	1	2
U48	17	6BZ_1057	TRTHYLLLAKNGSVFEM	33.0207	4	2	3
U48	17	6BZ_1064s	MQRHMQLLIGNLSNPVE	13.75	4	2
U48	17	6BZ_1066	VDEEYRFISDATFVDET	18.7707	4	2	2
U48	17	6BZ_1068	TNSFVKTVLTYASLDRY	10.6457	4	1
U48	17	6BZ_1070s	KAPNLENIYSPSASPVR	9.89575	4	1
U48	17	6BZ_1076	FMILYIQNPAGDLTMMY	6.14575	4	1
U48	17	6BZ_1083	GIPQMMFLYGIVHFSYS	5.5	4	1
U48	17	6BZ_1091	MMFLYGIVHFSYSTKNT	8.14575	4	1
U48	17	6BZ_1098s	MLFRLWVFVLLTPSYSW	13	4	2
U48	17	6BZ_1108	TVLTYASLDRYRSDMME	8.625	4	2
U48	19	6BZ_1174	IDGPLQYIYIKNIDELK	7.3124	5	1	2
U48	19	6BZ_1178s	LNELIFPVQVRSAKITR	8.1124	5	2	1
U48	19	6BZ_1184	LTDDLLLIVEKDVVDEE	5.3364	5	1
U48	19	6BZ_1185	QPQIVYSLNLYPSHGIY	7.4624	5	1	1
U48	19	6BZ_1188	GDLTMMYGNTTDINFKA	6.9624	5	1	1
U48	19	6BZ_1189	TNYKYAGQDLLVLRNIS	7.5374	5	1	1
U48	20	6BZ_1199s	RPPDMARVAAIQSLSPS	8.3864	5	1	2
U48	20	6BZ_1207s	ATSIIITAIPLNSTSVS	9.2864	5	2	2
U48	20	6BZ_1217	VTNSFVKTVLTYASLDR	8.7364	5	2	1
U48	20	6BZ_1218s	FRLWVFVLLTPSYSWRP	9.7364	5	2	1
U54	21	6BZ_073	PVKDIVALASQPVSRAP	9.09733	3	1
U54	21	6BZ_1020	FPEKLNIQLSLTPHTAD	15.764	3	2
U54	21	6BZ_1033	NADIWINLQNTPLDQIF	25.4307	3	2	1
U54	21	6BZ_1039	YVLQLRLTTAAILKPGE	13.4307	3	2
U54	21	6BZ_1040	PNGPVKDIVALASQPVS	15.764	3	2
U54	21	6BZ_1050	QFILYGPLTRIKIYAAD	28.9307	3	2	1
U54	21	6BZ_1082	MSNIYVNIESPNGPVKD	23.5973	3	2	1
U54	21	6BZ_1086s	ELRYFKSGLGISPPSSS	19.4307	3	3
U54	23	6BZ_1147	ANVTVSNLPVQRIEAYD	7.84375	4		1
U54	23	6BZ_1164	FALPYANVTVSNLPVQR	10.229	4	2	1
U54	23	6BZ_1169	NSAKIEFISHRHVSISR	19.6457	4	2	2
U54	23	6BZ_1193	IVLNIFALPYANVTVSN	19.4383	4	3	2
U54	23	6BZ_1209	TVAHVTPEISMGIFLKS	7.104	4	1
U57	27	6BZ_100s	NKHAFMILKQVISQSIS	18.25	3	1
U57	27	6BZ_1017	SLLSIMTLAAMHSKLSP	33.5	3	1	1
U57	27	6BZ_1023	RSNMFQSLKNRLLTSLF	72.25	3	2	1
U57	27	6BZ_1031s	SKIFYFSVLPALSNNKA	18.5	3	2	1
U57	27	6BZ_1201	LGKVLFFIQLPRVATGN	14.5	3	1	1
U57	27	6BZ_1205	EISDVQRMNLIDSSVVF	13.9167	3	2
U57	27	6BZ_1206	KDQVVQRIDFADILPSV	16.9167	3	1	1
U57	27	6BZ_1208	QILNINALHTVLRSLKN	4.33333	3	1
U57	28	6BZ_1036	ALEFYNWQRTPFSVYSA	21.9443	3	2	1
U57	28	6BZ_1038	MGSKIQNLFSAFPIHAF	85.4583	4	3	2
U57	28	6BZ_1041	PLNIFNDIKTYTAEQLF	37.5832	4	2	1
U57	28	6BZ_1043s	AFMILKQVISQSISYWF	7.27767	3	1
U57	28	6BZ_1045	AFAHYRNLVSLIRLVKR	18.2777	3	2
U57	28	6BZ_1046	SIQKLTNILSQYISTQV	22.4443	3	2	1
U57	28	6BZ_1049s	HYSNYAIGETIPLQLII	20.5832	4	3	1
U57	28	6BZ_1058	LQLTFFFPLGIYIPTET	16.9582	4	3
U57	28	6BZ_1059s	YNISFEALLGIYSNKIE	15.1943	3	1	1
U57	28	6BZ_1060s	DLTYIQKNRATEVLSTP	14.0207	4	2
U57	28	6BZ_1063	MQTLLRKSPPQFIVLTM	20.2707	4	3	1
U57	29	6BZ_1065s	SPNSLLSIMTLAAMHSK	12.625	3	1	1
U57	29	6BZ_1072	NLVSLIRLVKRTISISN	26.4583	3	3	1
U57	29	6BZ_1074	NKIEWINFFTTPIAVAA	8.125	3	1
U57	29	6BZ_1078s	KIFYFSVLPALSNNKAS	10.0833	3	1
U57	29	6BZ_1079	TAIAYRAIMADFTQFTV	16.125	4	1	1
U57	29	6BZ_1080s	TGHRFSQLSQLKITREN	7.75	3	1
U57	29	6BZ_1084	PIGSIQKLTNILSQYIS	21.4874	5	4	3
U57	29	6BZ_1087	LVSLIRLVKRTISISNI	14.625	3	1	1
U31	30	6BZ_060	TNKIYLVLNTHTLKEIK	11.8438	4	2	2
U31	30	6BZ_092	YLTAFLILPYKFLNYIW	3.90625	4		1
U31	30	6BZ_094s	PEKPMHLMRSISIDTQL	21.3645	4	1	1
U31	30	6BZ_111s	VSSQYKLLSVSKSFIII	7.9895	4	1	1
U31	30	6BZ_113	KLFIYIITQAWTASEDS	20.1145	4	3	2
1. IFN-g response in SFU per million (mean and number of donors tested)
2. Number of positive donors by ER or DFR2x. Peptides showing responses in most donors selected for additional characterization shown in bold italics
